# Supplementary material
Source: PubMed Central journal article supplement (PMC3980428)
Supplement: mmc1.pdf [file mmc1.pdf]

The American Journal of Human Genetics, Volume 94

Supplemental Data

**Fine Mapping Seronegative and Seropositive  
Rheumatoid Arthritis to Shared and Distinct HLA Alleles  
by Adjusting for the Effects of Heterogeneity**

Buhm Han, Dorothée Diogo, Steve Eyre, Henrik Kallberg, Alexandra Zhernakova, John Bowes, Leonid Padyukov, Yukinori Okada, Miguel A. González-Gay, Solbritt Rantapää-Dahlqvist, Javier Martin, Tom W.J. Huizinga, Robert M. Plenge, Jane Worthington, Peter K. Gregersen, Lars Klareskog, Paul I.W. de Bakker, and Soumya Raychaudhuri

## Supplemental Figures

**Figure S1: Frequency of HLA-DR $\beta$ 1 Val11 in seronegative RA cases.** In the US and UK cohorts, we measured the seronegative case frequency of HLA-DR $\beta$ 1 Val11, a major risk factor for seropositive RA, as we increased the level of stringency of anti-CCP cutoff (i.e. as we reduced the cut-off). As we reduced the cut-off from the default values (5.0 in UK and 20.0 in US), we observed decreasing trend in the Val-11 frequency (Spearman  $P=6.9\times 10^{-5}$ ). This suggested that uncertainties in anti-CCP testing might have caused possible confounding from seropositive RA.

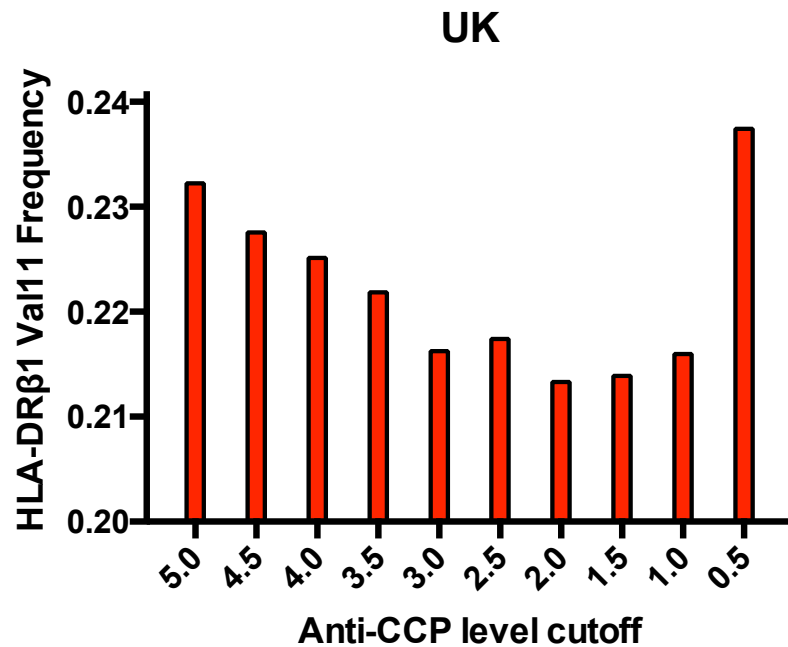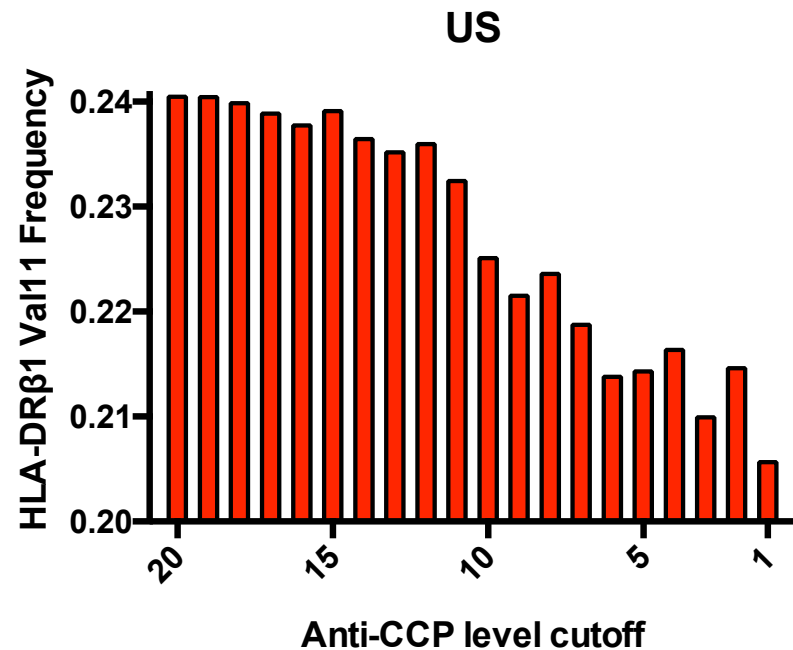

**Figure S2: Effects of individual amino acids within HLA proteins on seronegative and seropositive RA.** For each amino acid position, we listed the allele frequencies in cases (red) and controls (blue) along with univariate odds ratios (odds ratio of a residue taking the other residues as reference). Newly identified positions are in bold faces. For seronegative RA, we estimated odds ratios of Ser11+Leu11 of HLA-DR $\beta$ 1 and Asp9 of HLA-B by conditioning on each other. For seropositive RA, we estimated odds ratios at each position by conditioning on previous positions in forward search; the effects of HLA-B are conditioned on the classical *HLA-DRB1* alleles, the effects of HLA-DP $\beta$ 1 are conditioned on the *HLA-DRB1* alleles and HLA-B position 9, and the effects of HLA-A are conditioned on the *HLA-DRB1* alleles, HLA-B position 9, and HLA-DP $\beta$ 1 position 9.

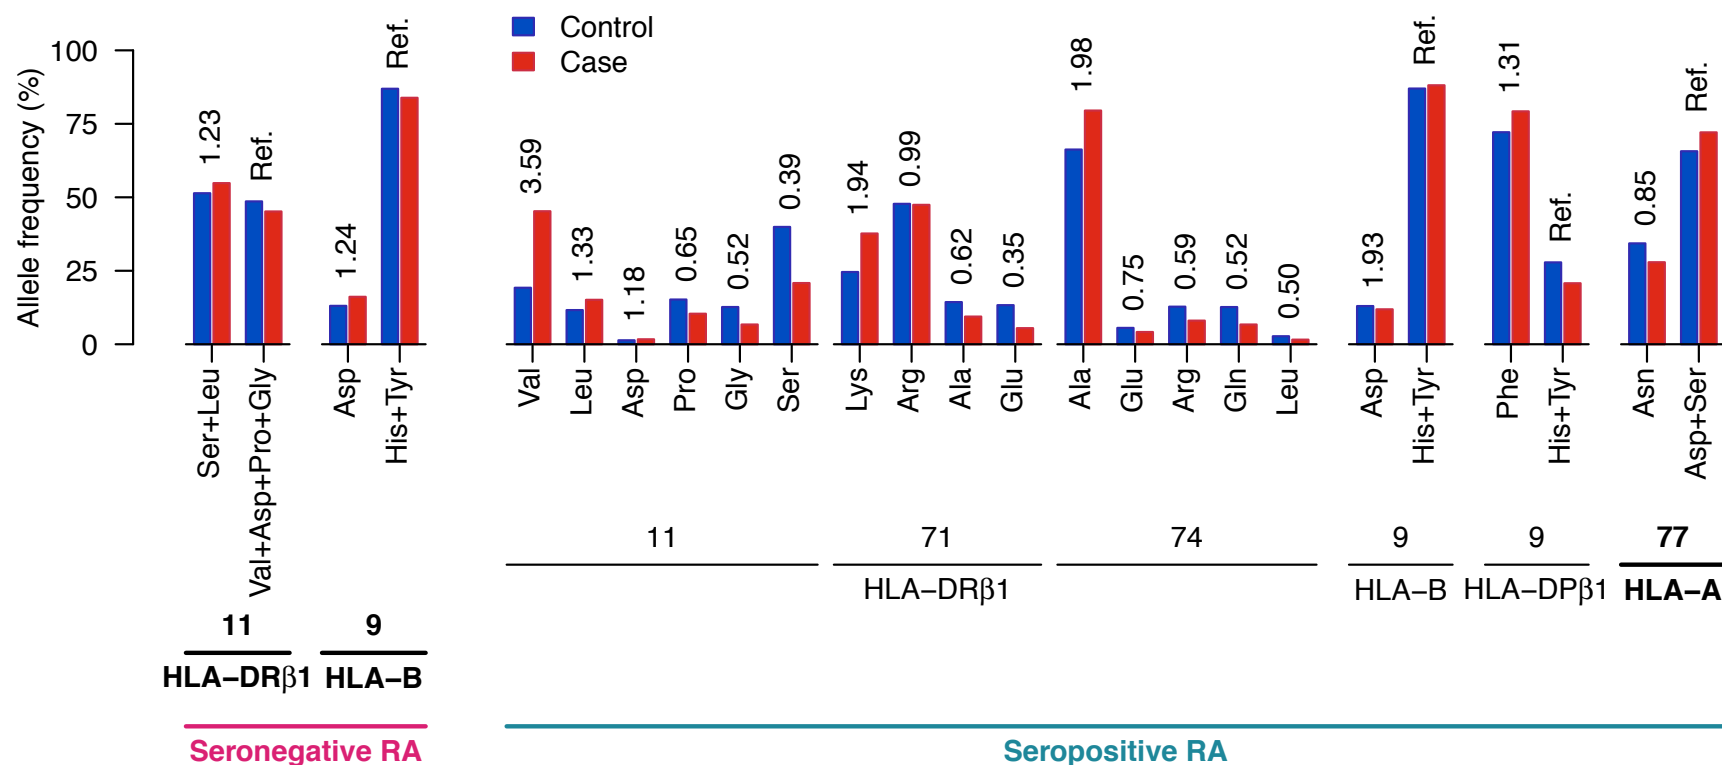

Figure S3: Comparison of confounding proportion estimates when using full GRS and non-overlapping loci GRS. For each cohort, we estimated the confounding proportion from ACPA+ RA (the proportion of samples that actually have ACPA+ RA) using genetic risk scores (GRS). First, we used GRS from the full list of known risk loci for ACPA+ RA (MHC loci in addition to 47 non-MHC loci). Then we used GRS from the selected list of loci that approximates non-overlapping loci between ACPA+ RA and ACPA- RA (38 loci that are not associated to ACPA- RA) (See Table S2). The mean estimate over the five cohorts were 26.3% for full GRS and 28.3% for non-overlapping loci GRS. Vertical lines denote 95% C.I..

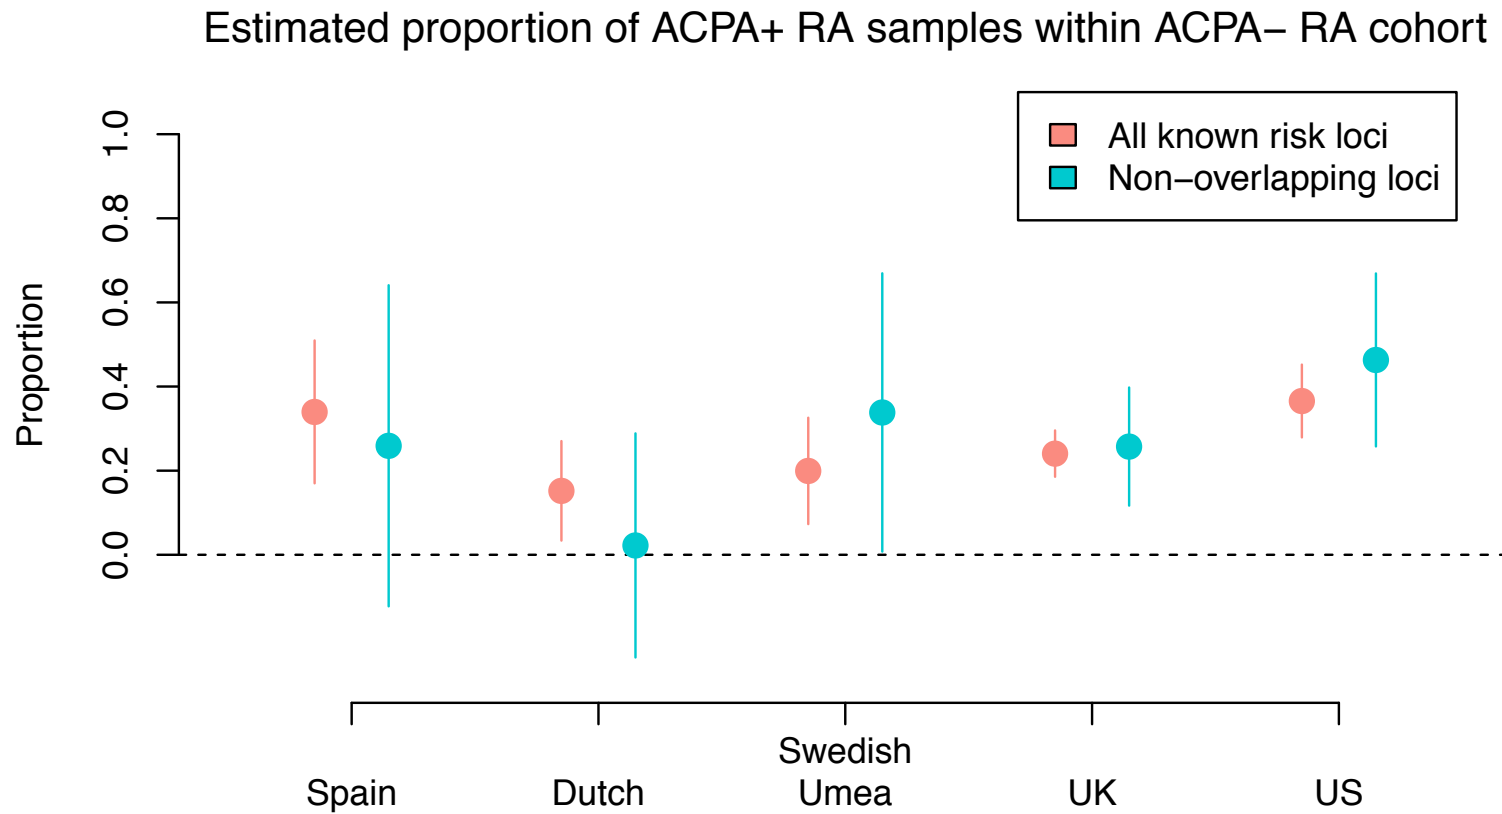

**Figure S4.** Association results within the MHC to seropositive rheumatoid arthritis. **(A)** We observed the most significant association in *HLA-DRB1*. **(B)** Conditioning on all *HLA-DRB1* alleles revealed an independent association at HLA-B Asp9. **(C)** Conditioning on all *HLA-DRB1* alleles and amino acids at HLA-B position 9 revealed an independent association at HLA-DP $\beta$ 1 Phe9. **(D)** Conditioning on *HLA-DRB1* alleles and amino acids at HLA-B position 9 and HLA-DP $\beta$ 1 position 9 revealed an independent association at HLA-A Asn77. **(E)** Conditioning on *HLA-DRB1* alleles and amino acids at HLA-B position 9, HLA-DP $\beta$ 1 position 9, and HLA-A position 77 did not reveal any convincingly significant association within MHC ( $P > 1.9 \times 10^{-6}$ ).

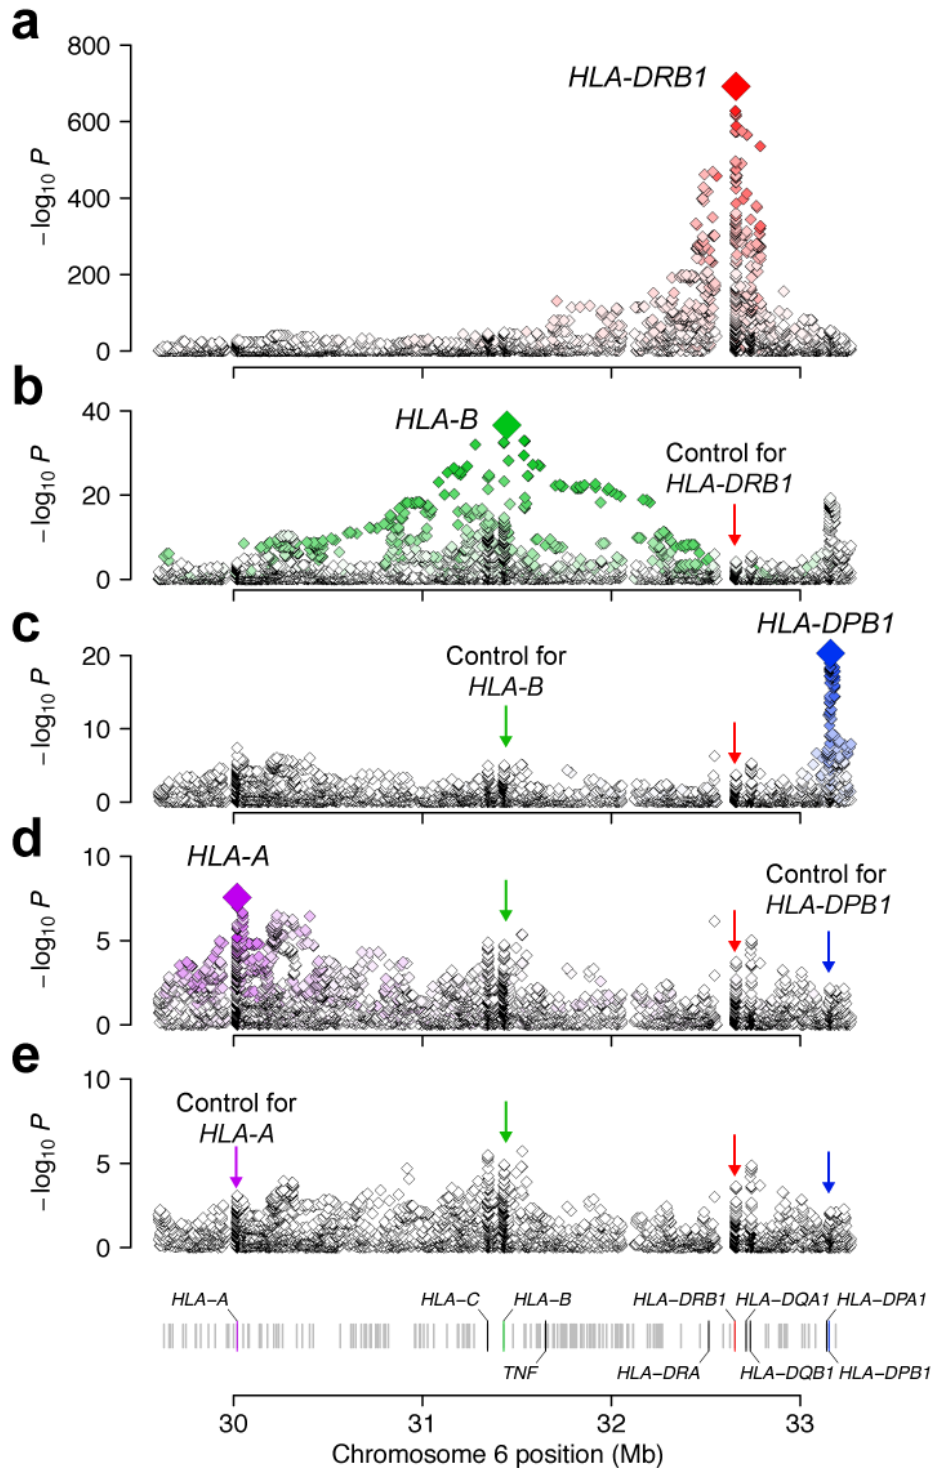

**Figure S5:** Overview of associated amino acid positions to seronegative and seropositive RA in three dimensional models. All associated positions are in binding grooves. Cyan/Green colors indicate associated positions to both diseases but having distinct effects depending on residues. Orange colors indicate associated positions to both diseases with shared effect size direction. Magenta colors indicate associated positions uniquely to seropositive RA. We used Protein Data Bank (PDB) entries 3pdo (HLA-DR), 3lqz (HLA-DP), 2bvp (HLA-B), and 1x7q (HLA-A) with UCSF Chimera to prepare the figure.

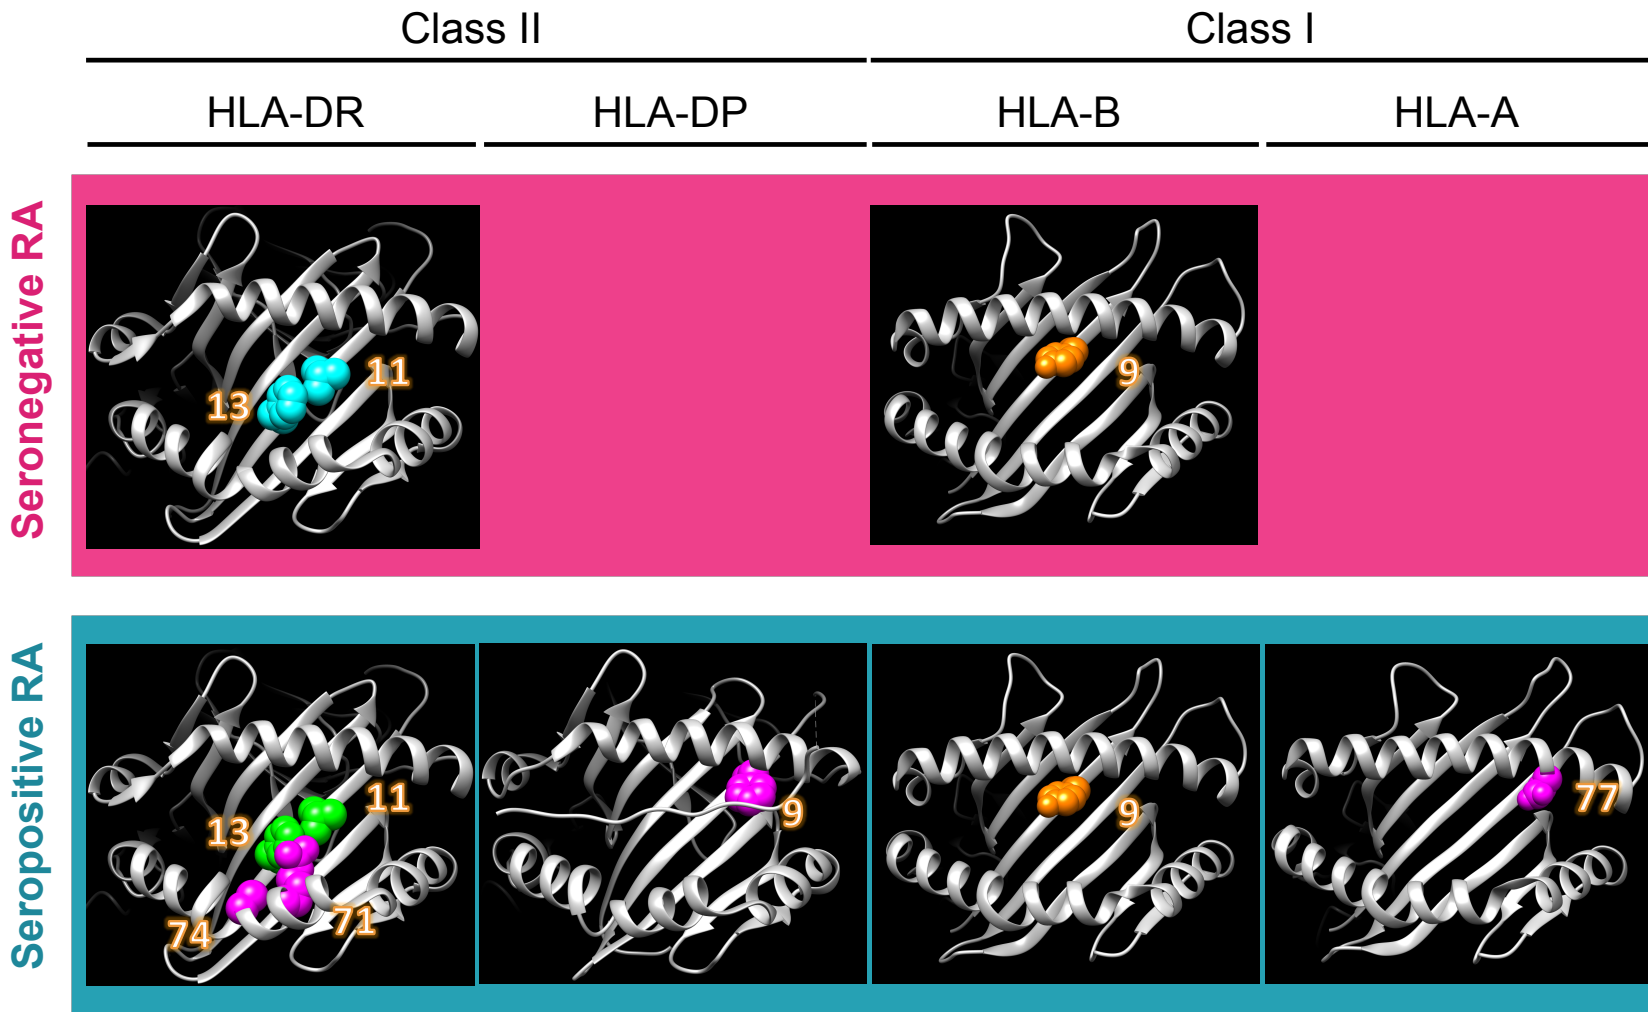

**Figure S6: Replication of individual effect sizes of amino acid residues at HLA-DR $\beta$ 1 position 11.** We plot the univariate odds ratio (odds ratio with respect to the other residues as reference) of six residues along with 95% confidence interval, in discovery analysis versus replication analysis. **(A)** When we accounted for possible heterogeneity using risk score corrections in the discovery analysis (See **Methods**), the individual effects were well replicated. The p-value for discordance test was not significant ( $P=0.44$ ). Green line indicates the fitted regression line, which ideally should follow the diagonal line. **(B)** If we do not adjust for risk scores in the discovery analysis, the individual effects were much less concordant to replication (discordance  $P=0.0045$ ).

**A**

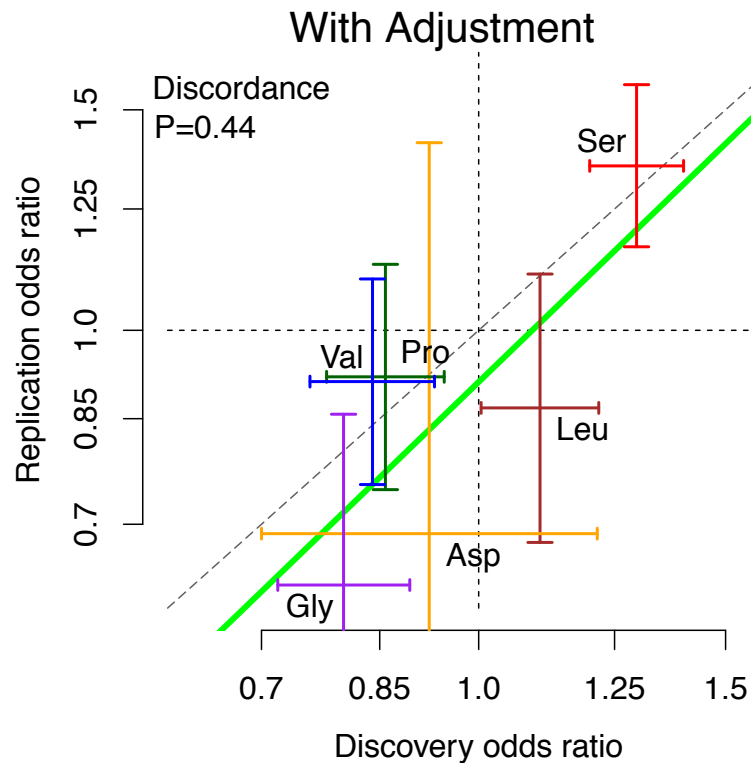

**B**

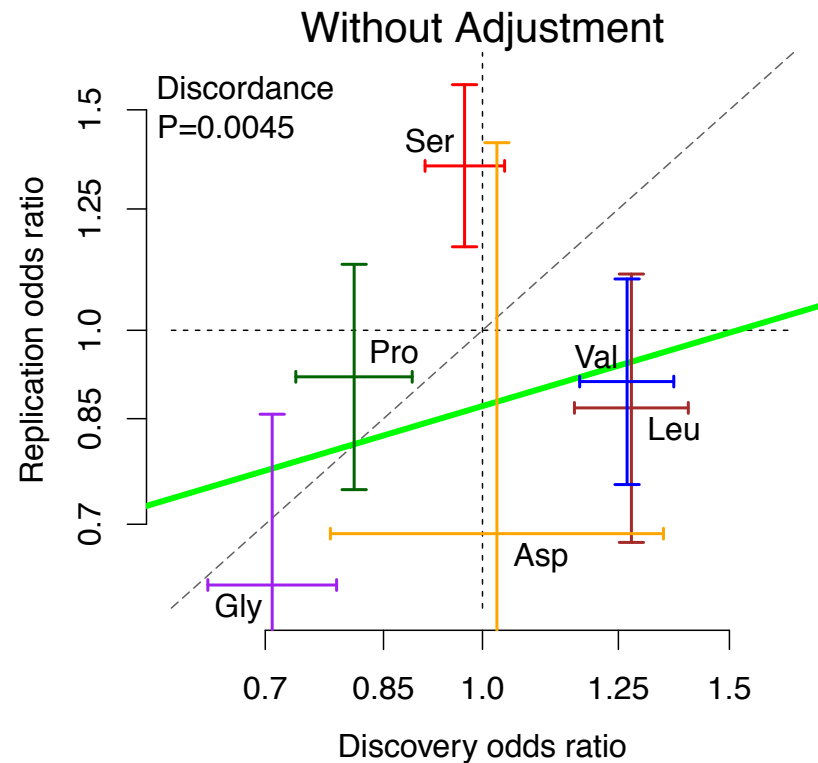

**Figure S7: Simulations under the null disease model.** We performed a simple simulation that splits UK controls to half and half as null cases and controls, and replaces  $\alpha\%$  of null cases with randomly sampled ACPA+ RA cases to simulate confounding. **(A)** Spurious associations due to the confounding exacerbated with increasing  $\alpha$  (Left pane). Red diamonds are spurious associations with  $P < 6E-6$ . After we adjust for risk scores, spurious associations disappeared (Right pane). The dotted horizontal line is the threshold  $6E-6$ . **(B)** We approximated the sample proportion of confounding disease using risk score. Vertical lines denote 95% C.I..

**A.**

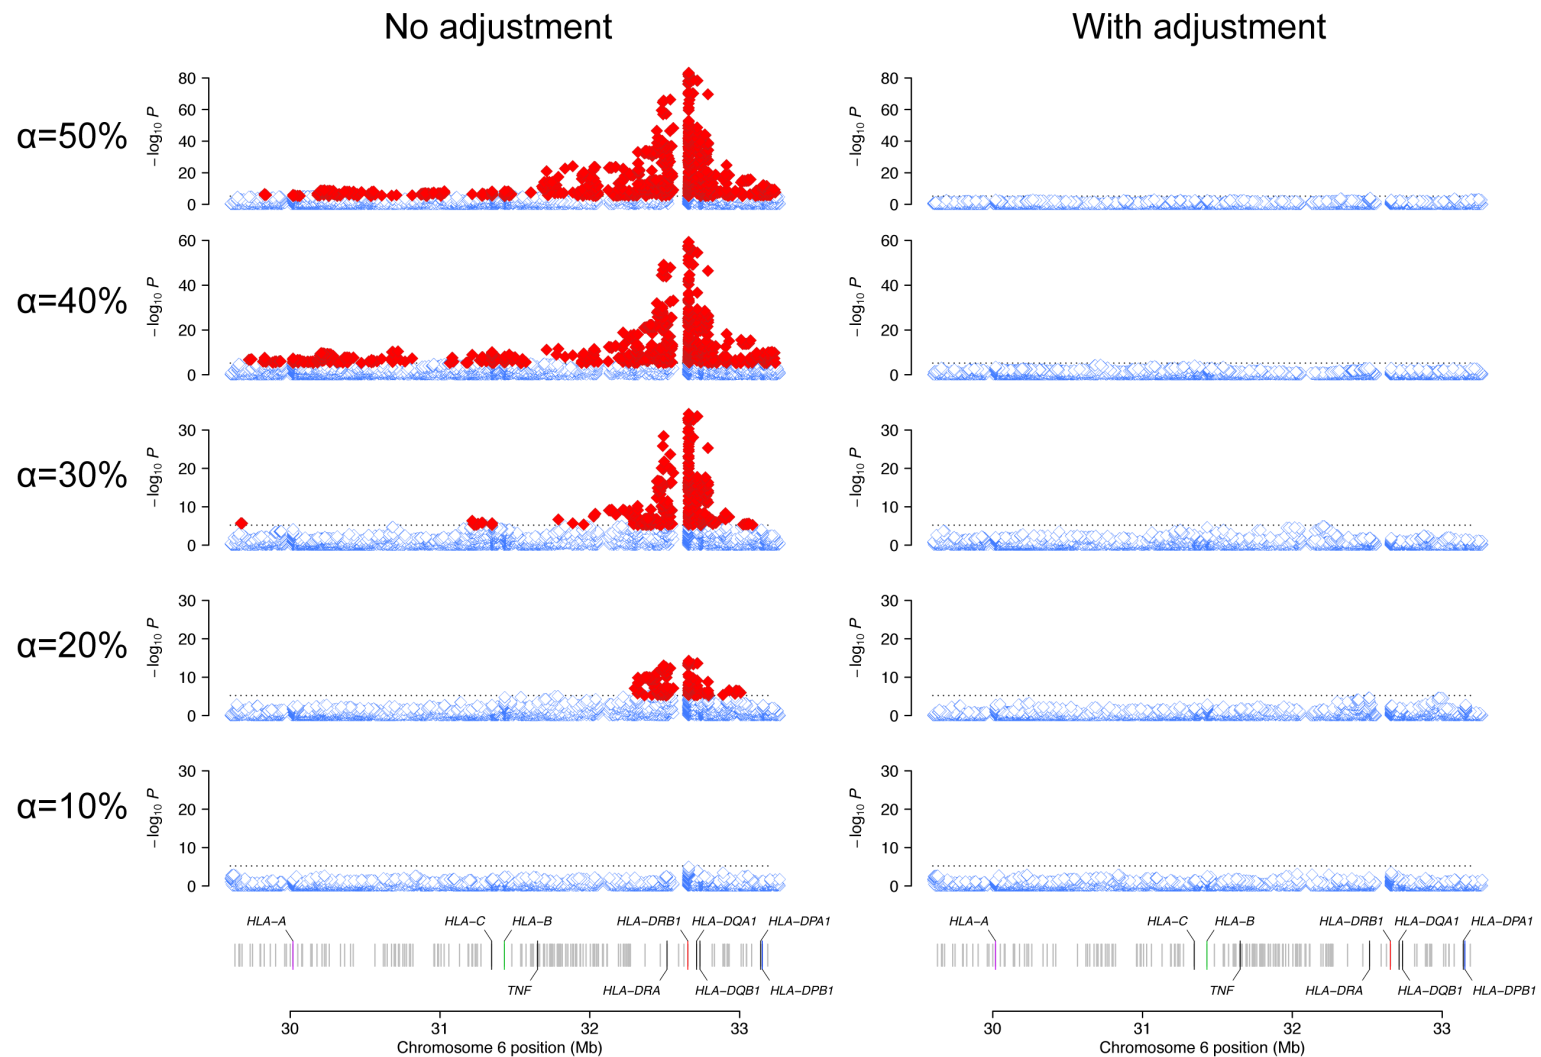



**B.**

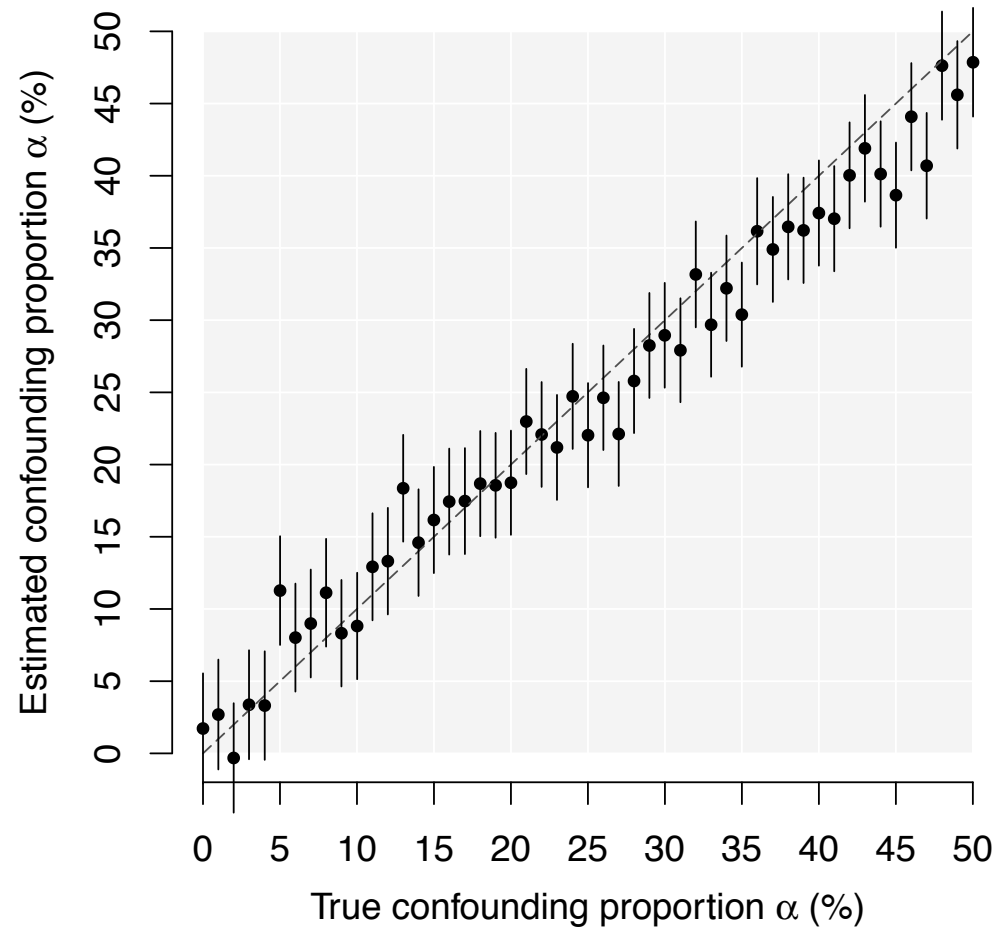

**Figure S8: Approximate relationship between confounding proportion and estimated proportion in logistic regression.** We assume one locus with MAF and specific odds ratio. Then we plot for each confounding proportion  $\alpha$  (x-axis), the expected value of the estimated proportion in logistic regression (y-axis). The numbers in grey boxes are odds ratios. Unless the odds ratio is large and the MAF is very low or high, the estimated  $\alpha$  approximates true  $\alpha$  well.

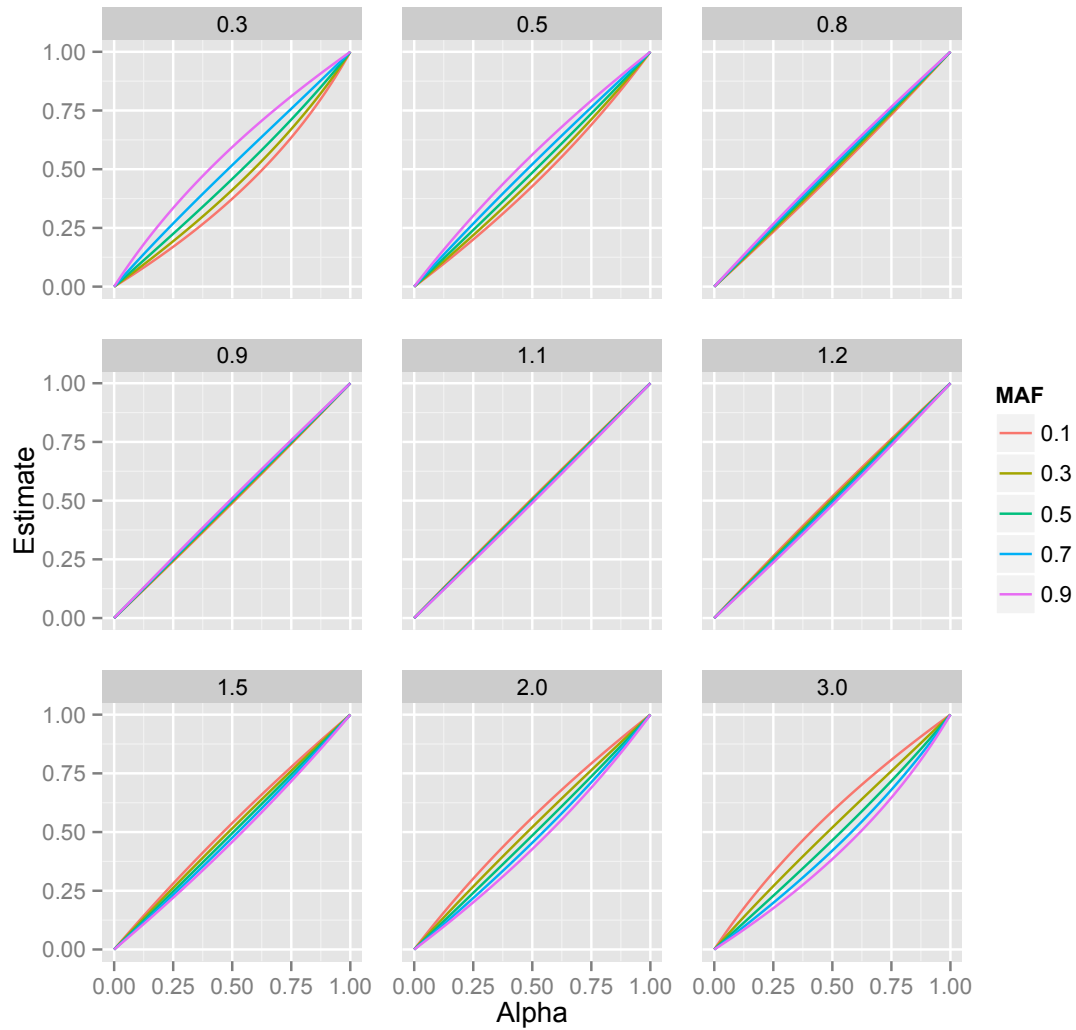

## Supplemental Tables

**Table S1: Sample Collections.** (A) For seronegative RA analysis, we collected five cohorts for the discovery analysis and an independent cohort for replication. Within five cohorts, we confirmed the seronegative status of samples using the conventional anti-CCP testing (yellow colors). In replication cohort, in order to stringently define seronegative samples, we additionally applied newly developed ACPA-specific sensitive testing (blue color) (**Material and Methods**). (B) For seropositive RA analysis, we collected six cohorts. We confirmed seropositive status of these samples using the conventional anti-CCP testing (yellow colors). We re-used the control samples for both seronegative and seropositive analyses.

### A. Sample collections for seronegative RA analysis

| Cohorts                            | Case | Control |
|------------------------------------|------|---------|
| <b>Discovery analysis</b>          |      |         |
| UK                                 | 1096 | 8430    |
| US                                 | 551  | 2134    |
| Dutch                              | 301  | 2004    |
| Swedish Umea                       | 242  | 963     |
| Spanish                            | 216  | 399     |
| Discovery analysis Total           | 2406 | 13930   |
| <b>Replication</b>                 |      |         |
| Swedish EIRA                       | 427  | 1691    |
| <b>Discovery+replication Total</b> | 2833 | 15621   |

### B. Sample collections for seropositive RA analysis

| Cohorts      | Case | Control |
|--------------|------|---------|
| UK           | 2463 | 8430    |
| US           | 1803 | 2134    |
| Dutch        | 330  | 2004    |
| Swedish Umea | 524  | 963     |
| Spanish      | 397  | 399     |
| Swedish EIRA | 1762 | 1940    |
| <b>Total</b> | 7279 | 15870   |

**Table S2. List of known associated SNPs used for defining risk scores for ACPA+ RA and AS. (A)** We used 47 RA associated loci reported in Eyre et al. 2012 to build genetic risk scores (GRS). We estimated the effect sizes of these loci with respect to ACPA+ RA using leave-one-out approach. In two-step approach, we used loci not associated to ACPA- RA ( $P > 0.01$ , last column) to build GRS. **(B)** We obtained the list of 24 AS associated loci from the Cortes et al. 2013. We used 19 loci that passed QC in our collections (right most column) in addition to HLA-B\*27 to build GRS. We used odds ratios reported in Cortes et al. 2013.

**A. 47 RA associated loci (Eyre et al. 2012)**

| SNP        | Gene     | Chromosome | Position of proxy | Proxy in ImmunoChip | $r^2$ to proxy | ACPA+ association P | ACPA- association P | ACPA- P > 0.01? |
|------------|----------|------------|-------------------|---------------------|----------------|---------------------|---------------------|-----------------|
| rs2843401  | TNFRSF14 | 1          | 2528133           | rs2843401           | 1              | 6.57E-09            | 6.02E-01            | TRUE            |
| rs2240336  | PADI4    | 1          | 17674402          | rs2240336           | 1              | 5.98E-09            | 2.83E-02            | TRUE            |
| rs883220   | INPP5B   | 1          | 38616871          | rs883220            | 1              | 1.01E-04            | 6.66E-02            | TRUE            |
| rs2476601  | PTPN22   | 1          | 114377568         | rs2476601           | 1              | 6.99E-77            | 1.74E-04            | FALSE           |
| rs11586238 | IGSF2    | 1          | 117263138         | rs11586238          | 1              | 3.42E-03            | 6.83E-01            | TRUE            |
| rs2228145  | IL6R     | 1          | 154426970         | rs2228145           | 1              | 1.58E-07            | 2.44E-02            | TRUE            |
| rs12746613 | FCGR2B   | 1          | 161467042         | rs12746613          | 1              | 6.91E-05            | 5.01E-02            | TRUE            |
| rs10919563 | PTPRC    | 1          | 198700442         | rs10919563          | 1              | 2.88E-04            | 5.90E-01            | TRUE            |
| rs34695944 | REL      | 2          | 61124850          | rs34695944          | 1              | 2.75E-08            | 2.89E-01            | TRUE            |
| rs1858036  | SPRED2   | 2          | 65598241          | rs1858036           | 1              | 1.04E-06            | 7.81E-01            | TRUE            |
| rs11676922 | AFF3     | 2          | 100806940         | rs11676922          | 1              | 2.27E-08            | 1.64E-02            | TRUE            |
| rs13426947 | STAT4    | 2          | 191933254         | rs13426947          | 1              | 7.44E-09            | 2.67E-03            | FALSE           |
| rs1980422  | CD28     | 2          | 204610396         | rs1980422           | 1              | 2.64E-07            | 4.72E-01            | TRUE            |
| rs11571302 | ICOS     | 2          | 204742934         | rs11571302          | 1              | 4.48E-08            | 1.21E-01            | TRUE            |
| rs13315591 | PXK      | 3          | 58555895          | rs9813011           | 1              | 1.72E-01            | 5.00E-01            | TRUE            |
| rs12506688 | RBPJ     | 4          | 26104113          | rs12506688          | 1              | 2.55E-10            | 4.18E-02            | TRUE            |
| rs6822844  | IL21     | 4          | 123509421         | rs6822844           | 1              | 4.04E-02            | 9.90E-02            | TRUE            |
| rs71624119 | ANKRD55  | 5          | 55440730          | rs71624119          | 1              | 1.20E-11            | 5.21E-12            | FALSE           |

|            |         |    |           |            |      |          |          |       |
|------------|---------|----|-----------|------------|------|----------|----------|-------|
| rs2561477  | PAM     | 5  | 102608924 | rs2561477  | 1    | 2.74E-05 | 6.20E-05 | FALSE |
| rs548234   | PRDM1   | 6  | 106568034 | rs548234   | 1    | 1.57E-02 | 5.18E-01 | TRUE  |
| rs10499194 | TNFAIP3 | 6  | 138002637 | rs10499194 | 1    | 8.15E-07 | 3.36E-01 | TRUE  |
| rs6920220  | TNFAIP3 | 6  | 138006504 | rs6920220  | 1    | 2.30E-13 | 3.76E-02 | TRUE  |
| rs58721818 | TNFAIP3 | 6  | 138243739 | rs58721818 | 1    | 5.99E-12 | 1.14E-01 | TRUE  |
| rs212389   | TAGAP   | 6  | 159489791 | rs212389   | 1    | 2.95E-06 | 7.15E-01 | TRUE  |
| rs59466457 | CCR6    | 6  | 167537754 | rs59466457 | 1    | 2.91E-10 | 6.41E-01 | TRUE  |
| rs3807306  | IRF5    | 7  | 128580680 | rs3807306  | 1    | 1.90E-07 | 2.22E-02 | TRUE  |
| rs10488631 | IRF5    | 7  | 128594183 | rs10488631 | 1    | 2.02E-03 | 4.44E-04 | FALSE |
| rs2736340  | BLK     | 8  | 11343973  | rs2736340  | 1    | 1.94E-04 | 4.92E-04 | FALSE |
| rs951005   | CCL21   | 9  | 34743681  | rs951005   | 1    | 3.82E-02 | 3.73E-01 | TRUE  |
| rs2269060  | TRAF1   | 9  | 123683569 | rs2269060  | 1    | 5.58E-06 | 9.46E-02 | TRUE  |
| rs10795791 | IL2RA   | 10 | 6108340   | rs10795791 | 1    | 4.75E-06 | 6.24E-02 | TRUE  |
| rs4750316  | PRKCQ   | 10 | 6393260   | rs4750316  | 1    | 4.54E-04 | 1.00E-01 | TRUE  |
| rs2275806  | GATA3   | 10 | 8095340   | rs2275806  | 1    | 1.45E-05 | 3.50E-02 | TRUE  |
| rs12764378 | ARID5B  | 10 | 63800004  | rs12764378 | 1    | 1.68E-06 | 6.93E-01 | TRUE  |
| rs540386   | TRAF6   | 11 | 36509189  | rs5030485  | 0.93 | 4.47E-02 | 3.16E-01 | TRUE  |
| rs595158   | CD5     | 11 | 60909581  | rs595158   | 1    | 3.88E-05 | 4.07E-03 | FALSE |
| rs10892279 | DDX6    | 11 | 118611781 | rs10892279 | 1    | 2.13E-06 | 8.05E-01 | TRUE  |
| rs1678542  | KIF5A   | 12 | 57968715  | rs1678542  | 1    | 1.04E-03 | 6.17E-01 | TRUE  |
| rs8043085  | RASGRP1 | 15 | 38828140  | rs8043085  | 1    | 1.36E-10 | 3.70E-01 | TRUE  |
| rs8026898  | TLE3    | 15 | 69991417  | rs8026898  | 1    | 1.27E-10 | 3.64E-03 | FALSE |
| rs13330176 | IRF8    | 16 | 86019087  | rs13330176 | 1    | 3.85E-08 | 7.76E-01 | TRUE  |
| rs2872507  | IKZF3   | 17 | 38040763  | rs2872507  | 1    | 1.28E-06 | 2.15E-01 | TRUE  |
| rs34536443 | TYK2    | 19 | 10463118  | rs34536443 | 1    | 2.24E-14 | 1.16E-02 | TRUE  |
| rs4810485  | CD40    | 20 | 44747947  | rs4810485  | 1    | 1.45E-09 | 9.19E-01 | TRUE  |

|           |       |    |          |           |   |          |          |       |
|-----------|-------|----|----------|-----------|---|----------|----------|-------|
| rs2834512 | RCAN1 | 21 | 35911599 | rs2834512 | 1 | 2.16E-04 | 5.82E-01 | TRUE  |
| rs9979383 | RUNX1 | 21 | 36715761 | rs9979383 | 1 | 3.76E-05 | 1.02E-04 | FALSE |
| rs3218253 | IL2RB | 22 | 37544810 | rs3218253 | 1 | 2.55E-07 | 3.16E-01 | TRUE  |

**B. 24 AS associated loci (Cortes et al. 2013)**

| SNP             | Gene                | Chromosome | Position  | Risk allele/non-Risk allele | Odds ratio | QC passed in our dataset |
|-----------------|---------------------|------------|-----------|-----------------------------|------------|--------------------------|
| rs11209026      | IL23R               | 1p31       | 67478546  | G/A                         | 1.62       | O                        |
| rs1801274       | FCGR2A              | 1q23       | 159746369 | T/C                         | 1.11       | O                        |
| rs4129267       | IL6R                | 1q21       | 152692888 | C/T                         | 1.14       | X                        |
| rs41299637      | GPR25-KIF21B        | 1q32       | 199144473 | T/G                         | 1.19       | O                        |
| rs6600247       | RUNX3               | 1p36       | 25177701  | C/T                         | 1.15       | O                        |
| rs12615545      | UBE2E3              | 2q31       | 181756697 | C/T                         | 1.12       | O                        |
| rs4676410       | GPR35               | 2q37       | 241212412 | T/C                         | 1.13       | X                        |
| rs6759298       | Intergenic          | 2p15       | 62421949  | C/G                         | 1.29       | O                        |
| rs12186979      | PTGER4              | 5p13       | 40560617  | G/A                         | 1.08       | O                        |
| rs30187         | ERAP1               | 5q15       | 96150086  | T/C                         | 1.29       | O                        |
| rs6871626       | IL12B               | 5q33       | 158759370 | A/C                         | 1.1        | O                        |
| rs17765610      | BACH2               | 6q15       | 90722494  | G/A                         | 1.15       | O                        |
| rs1128905       | CARD9               | 9q34       | 138373660 | C/T                         | 1.1        | X                        |
| rs11190133      | NKX2-3              | 10q24      | 101268715 | C/T                         | 1.15       | O                        |
| rs1250550       | ZMIZ1               | 10q22      | 80730323  | G/T                         | 1.11       | O                        |
| rs11065898      | SH2B3               | 12q24      | 110346958 | T/C                         | 1.11       | O                        |
| rs1860545       | LTBR-TNFRSF1A       | 12p13      | 6317038   | C/T                         | 1.13       | O                        |
| rs11624293      | GPR65               | 14q31      | 87558574  | C/T                         | 1.2        | O                        |
| imm_16_28525386 | IL27-SULT1A1        | 16p11      | 28525386  | A/G                         | 1.11       | X                        |
| rs2531875       | NOS2                | 17q11      | 23172294  | G/T                         | 1.12       | O                        |
| rs9901869       | NPEPPS-TBKBP1-TBX21 | 17q21      | 42930205  | A/G                         | 1.14       | O                        |
| rs35164067      | TYK2                | 19p13      | 10386181  | G/A                         | 1.14       | O                        |
| rs2836883       | Intergenic          | 21q22      | 39388614  | G/A                         | 1.18       | O                        |

|           |        |       |          |     |      |   |
|-----------|--------|-------|----------|-----|------|---|
| rs7282490 | ICOSLG | 21q22 | 44440169 | G/A | 1.11 | X |
|-----------|--------|-------|----------|-----|------|---|

**Table S3. Imputation accuracy in current dataset and previous dataset (Raychaudhuri et al. 2012).** To measure imputation accuracy, we typed *HLA-A*, *HLA-B*, *HLA-C*, *HLA-DQB1*, and *HLA-DRB1* in 918 individuals in UK cohort. Then we calculated imputation accuracy as the proportion of the alleles correctly imputed (Online Methods). For each gene, we only used individuals whose four-digit typing was successful.

| Gene            | Two digit alleles                        |                                        |                                                   | Four digit alleles                       |                                        |                                                   |
|-----------------|------------------------------------------|----------------------------------------|---------------------------------------------------|------------------------------------------|----------------------------------------|---------------------------------------------------|
|                 | Accuracy in previous dataset, $A_{prev}$ | Accuracy in current dataset, $A_{new}$ | Error reduction ratio, $(1-A_{prev})/(1-A_{new})$ | Accuracy in previous dataset, $A_{prev}$ | Accuracy in current dataset, $A_{new}$ | Error reduction ratio, $(1-A_{prev})/(1-A_{new})$ |
| <i>HLA-A</i>    | 0.972                                    | 0.988                                  | 2.43                                              | 0.967                                    | 0.983                                  | 2.00                                              |
| <i>HLA-B</i>    | 0.945                                    | 0.982                                  | 3.07                                              | 0.936                                    | 0.972                                  | 2.30                                              |
| <i>HLA-C</i>    | 0.968                                    | 0.985                                  | 2.07                                              | 0.957                                    | 0.978                                  | 1.92                                              |
| <i>HLA-DQB1</i> | 0.964                                    | 0.994                                  | 6.20                                              | 0.829                                    | 0.987                                  | 13.32                                             |
| <i>HLA-DRB1</i> | 0.943                                    | 0.974                                  | 2.16                                              | 0.870                                    | 0.926                                  | 1.76                                              |
| <b>Average</b>  | <b>0.959</b>                             | <b>0.985</b>                           | <b>2.70</b>                                       | <b>0.912</b>                             | <b>0.969</b>                           | <b>2.87</b>                                       |

**Table S4: List of binary markers defined within MHC and the association results at these markers.**

Described in a separate Excel file.



**Table S5. Exhaustive pairwise search results for associations in *HLA-DRB1* and *HLA-B*.** In order to find the best pair of markers explaining the associations to seronegative RA, we tested every possible pair of binary markers between *HLA-DRB1* and *HLA-B*. The total number of tests was 383,130 (495 markers in DRB1 × 774 markers in B). We tested each pair by including them in the logistic regression and comparing the deviance to chi-square distribution with 2 degrees of freedom. We show the top 20 pairs. The best pair was Ser11+Leu11 from *HLA-DRB1*, and from *HLA-B*, one of B\*0801, B\*08, HLA-B Asp9, and rs2596492 at the first base position of the codon at position 9. The four markers at *HLA-B* are in almost perfect LD ( $r^2 \geq 0.997$ ) and statistically indistinguishable.

| Rank | <i>HLA-DRB1</i>         |                   | <i>HLA-B</i>         |                     | Deviance | P-value  |
|------|-------------------------|-------------------|----------------------|---------------------|----------|----------|
|      | SNP2HLA ID              | Marker            | SNP2HLA ID           | Marker              |          |          |
| 1    | AA_DRB1_11_32660115_SL  | Ser11+Leu11       | HLA_B_0801           | HLA-B*0801          | 92.255   | 9.30E-21 |
| 2    | AA_DRB1_11_32660115_SL  | Ser11+Leu11       | HLA_B_08             | HLA-B*08            | 92.251   | 9.30E-21 |
| 3    | AA_DRB1_11_32660115_SL  | Ser11+Leu11       | AA_B_9_31432689_D    | Asp9                | 92.007   | 1.00E-20 |
| 4    | AA_DRB1_11_32660115_SL  | Ser11+Leu11       | SNP_B_31432690_C     | rs2596492(C_vs_G+T) | 92.007   | 1.00E-20 |
| 5    | AA_DRB1_11_32660115_SLD | Ser11+Leu11+Asp11 | HLA_B_0801           | HLA-B*0801          | 89.967   | 2.90E-20 |
| 6    | AA_DRB1_11_32660115_SLD | Ser11+Leu11+Asp11 | HLA_B_08             | HLA-B*08            | 89.962   | 2.90E-20 |
| 7    | AA_DRB1_13_32660109_SFG | Ser13+Phe13+Gly13 | HLA_B_0801           | HLA-B*0801          | 89.921   | 3.00E-20 |
| 8    | AA_DRB1_13_32660109_SFG | Ser13+Phe13+Gly13 | HLA_B_08             | HLA-B*08            | 89.916   | 3.00E-20 |
| 9    | AA_DRB1_11_32660115_SLD | Ser11+Leu11+Asp11 | AA_B_9_31432689_D    | Asp9                | 89.713   | 3.30E-20 |
| 10   | AA_DRB1_11_32660115_SLD | Ser11+Leu11+Asp11 | SNP_B_31432690_C     | rs2596492(C_vs_G+T) | 89.713   | 3.30E-20 |
| 11   | AA_DRB1_13_32660109_SFG | Ser13+Phe13+Gly13 | AA_B_9_31432689_D    | Asp9                | 89.663   | 3.40E-20 |
| 12   | AA_DRB1_13_32660109_SFG | Ser13+Phe13+Gly13 | SNP_B_31432690_C     | rs2596492(C_vs_G+T) | 89.663   | 3.40E-20 |
| 13   | AA_DRB1_11_32660115_SL  | Ser11+Leu11       | SNP_B_31430769       | rs2523607           | 86.743   | 1.50E-19 |
| 14   | AA_DRB1_11_32660115_SL  | Ser11+Leu11       | SNP_B_31431395       | rs2596495           | 86.688   | 1.50E-19 |
| 15   | AA_DRB1_11_32660115_SL  | Ser11+Leu11       | SNP_B_31431485       | rs4990036           | 86.619   | 1.60E-19 |
| 16   | AA_DRB1_11_32660115_SL  | Ser11+Leu11       | AA_B_97_31432180_SNV | Ser97+Val97+Asn97   | 84.906   | 3.70E-19 |
| 17   | AA_DRB1_11_32660115_SL  | Ser11+Leu11       | AA_B_97_31432180_SV  | Ser97+Val97         | 84.652   | 4.10E-19 |
| 18   | AA_DRB1_11_32660115_SL  | Ser11+Leu11       | SNP_B_31432582       | rs9266178           | 84.514   | 4.40E-19 |
| 19   | AA_DRB1_11_32660115_SL  | Ser11+Leu11       | SNP_B_31432583       | rs9266179           | 84.514   | 4.40E-19 |
| 20   | AA_DRB1_11_32660115_SL  | Ser11+Leu11       | AA_B_45_31432581_EG  | Glu45+Gly45         | 84.486   | 4.50E-19 |

**Table S6. RF status-stratified analysis results in the UK cohort.** We obtained rheumatoid factor (RF) data for the cases in the UK cohort. We stratified the cases into two groups based on the RF status and examined association results in each group, controlling for heterogeneity due to possible confounding from ACPA+ RA and AS.

| CCP and RF status | # Cases | HLA-DR $\beta$ 1 Ser11+Leu11 |                  | HLA-B Asp9 |                  | Estimated confounding proportion |       |
|-------------------|---------|------------------------------|------------------|------------|------------------|----------------------------------|-------|
|                   |         | P-value                      | OR (CI95)        | P-value    | OR (CI95)        | ACPA+ RA                         | AS    |
| All CCP-          | 1096    | 5.7E-11                      | 1.38 (1.26-1.53) | 2.3E-5     | 1.31 (1.16-1.48) | 0.241                            | 0.099 |
| CCP- / RF+        | 470     | 6.2E-9                       | 1.53 (1.32-1.77) | 8.1E-7     | 1.56 (1.32-1.85) | 0.255                            | 0.090 |
| CCP- / RF-        | 546     | 1.8E-4                       | 1.29 (1.13-1.47) | 0.08       | 1.17 (0.99-1.39) | 0.233                            | 0.118 |

**Table S7. Forward conditional haplotype analysis on individual HLA-DR $\beta$ 1 amino acid residues for ACPA+ RA.** For each amino acid position in HLA-DR $\beta$ 1 (column 1), we partitioned the classical alleles into groups based on the amino acid residues and performed omnibus association testing where the degree of freedom (**df**) is the number of partitions minus one. We included the signal peptide in the test (negative positions). If multiple amino acid positions are statistically the same (give the exactly same partitioning all the time), we only kept the position with the lowest position number. The most significant amino acid positions were 11 and 13 (highlighted), which were statistically indistinguishable ( $P > 0.03$ ). Then we performed conditional analysis where given the partitioning defined on position 11, if further partitioning by additional amino acid gives significant p-value. Conditioning on 11, we found 71 is significant (highlighted), and conditioning on 11 and 71, we found 74 was significant (highlighted). Conditioning on 11, 71, and 74, the most significant was position 70 (highlighted).

| Condition:          | On Nothing |          |              | On Position 11 |          |              | On Positions 11 and 71 |          |              | On positions 11, 71 and 74 |          |              |
|---------------------|------------|----------|--------------|----------------|----------|--------------|------------------------|----------|--------------|----------------------------|----------|--------------|
| Amino acid position | df         | $\chi^2$ | $\log_{10}P$ | df             | $\chi^2$ | $\log_{10}P$ | df                     | $\chi^2$ | $\log_{10}P$ | df                         | $\chi^2$ | $\log_{10}P$ |
| -29                 | 1          | 124.26   | -28.13       | 1              | 0.84     | -0.44        | 1                      | 3.30     | -1.16        | 1                          | 10.34    | -2.89        |
| -25                 | 2          | 1274.28  | -276.71      | 2              | 5.31     | -1.15        | 2                      | 15.67    | -3.40        | 2                          | 19.79    | -4.30        |
| -24                 | 2          | 2669.56  | -579.69      | 2              | 5.31     | -1.15        | 2                      | 15.67    | -3.40        | 2                          | 19.79    | -4.30        |
| -17                 | 2          | 149.22   | -32.40       | 1              | 0.84     | -0.44        | 1                      | 3.30     | -1.16        | 1                          | 10.34    | -2.89        |
| -16                 | 2          | 1274.28  | -276.71      | 2              | 5.31     | -1.15        | 2                      | 15.67    | -3.40        | 2                          | 19.79    | -4.30        |
| -1                  | 2          | 355.64   | -77.23       | 2              | 15.15    | -3.29        | 1                      | 3.30     | -1.16        | 1                          | 10.34    | -2.89        |
| 1                   | 1          | 1.64     | -0.70        | 1              | 5.12     | -1.63        | 1                      | 4.95     | -1.58        | 1                          | 4.14     | -1.38        |
| 4                   | 2          | 251.49   | -54.61       | 1              | 5.12     | -1.63        | 1                      | 4.95     | -1.58        | 1                          | 4.14     | -1.38        |
| 9                   | 2          | 207.59   | -45.08       | 0              | 0.00     | 0.00         | 0                      | 0.00     | 0.00         | 0                          | 0.00     | 0.00         |
| 10                  | 2          | 1572.99  | -341.57      | 1              | 4.48     | -1.47        | 1                      | 12.67    | -3.43        | 1                          | 8.35     | -2.41        |
| 11                  | 5          | 3551.51  | -766.45      | 0              | 0.00     | 0.00         | 0                      | 0.00     | 0.00         | 0                          | 0.00     | 0.00         |
| 12                  | 1          | 1504.66  | -328.42      | 0              | 0.00     | 0.00         | 0                      | 0.00     | 0.00         | 0                          | 0.00     | 0.00         |
| 13                  | 5          | 3489.63  | -753.02      | 2              | 7.29     | -1.58        | 2                      | 15.01    | -3.26        | 2                          | 9.65     | -2.10        |
| 14                  | 1          | 313.74   | -69.48       | 0              | 0.00     | 0.00         | 0                      | 0.00     | 0.00         | 0                          | 0.00     | 0.00         |
| 16                  | 1          | 111.92   | -25.43       | 1              | 2.81     | -1.03        | 1                      | 1.68     | -0.71        | 1                          | 1.17     | -0.55        |
| 26                  | 2          | 224.95   | -48.85       | 2              | 75.19    | -16.33       | 2                      | 24.89    | -5.41        | 2                          | 10.57    | -2.29        |

|     |   |         |         |   |        |        |   |       |        |   |       |        |
|-----|---|---------|---------|---|--------|--------|---|-------|--------|---|-------|--------|
| 28  | 2 | 15.31   | -3.33   | 1 | 15.64  | -4.12  | 1 | 23.79 | -5.97  | 1 | 9.60  | -2.71  |
| 30  | 5 | 498.85  | -104.85 | 2 | 14.94  | -3.24  | 2 | 22.79 | -4.95  | 2 | 10.28 | -2.23  |
| 31  | 2 | 218.07  | -47.35  | 1 | 4.48   | -1.47  | 1 | 12.67 | -3.43  | 1 | 8.35  | -2.41  |
| 32  | 1 | 708.24  | -155.32 | 1 | 4.62   | -1.50  | 1 | 11.02 | -3.04  | 1 | 56.73 | -13.30 |
| 33  | 1 | 2639.72 | -575.02 | 1 | 4.48   | -1.47  | 1 | 12.67 | -3.43  | 1 | 8.35  | -2.41  |
| 37  | 4 | 1864.09 | -401.81 | 4 | 11.68  | -1.70  | 4 | 12.36 | -1.83  | 4 | 73.74 | -14.43 |
| 38  | 2 | 144.08  | -31.29  | 2 | 14.13  | -3.07  | 2 | 21.95 | -4.77  | 2 | 9.88  | -2.15  |
| 40  | 1 | 125.01  | -28.30  | 1 | 4.48   | -1.47  | 1 | 12.67 | -3.43  | 1 | 8.35  | -2.41  |
| 47  | 1 | 1642.11 | -358.28 | 1 | 1.99   | -0.80  | 1 | 2.60  | -0.97  | 1 | 9.29  | -2.64  |
| 57  | 3 | 425.20  | -91.11  | 3 | 10.40  | -1.81  | 3 | 9.87  | -1.71  | 3 | 43.16 | -8.64  |
| 58  | 1 | 241.01  | -53.63  | 1 | 2.57   | -0.96  | 1 | 1.47  | -0.65  | 1 | 33.10 | -8.06  |
| 60  | 2 | 374.12  | -81.24  | 2 | 10.40  | -2.26  | 2 | 9.56  | -2.08  | 2 | 41.65 | -9.04  |
| 67  | 2 | 2107.81 | -457.70 | 2 | 143.52 | -31.16 | 2 | 2.11  | -0.46  | 2 | 84.35 | -18.32 |
| 70  | 2 | 1610.74 | -349.77 | 2 | 85.29  | -18.52 | 2 | 2.33  | -0.51  | 2 | 93.66 | -20.34 |
| 71  | 3 | 1279.84 | -276.46 | 3 | 222.78 | -47.30 | 0 | 0.00  | 0.00   | 0 | 0.00  | 0.00   |
| 73  | 1 | 574.88  | -126.31 | 1 | 52.92  | -12.46 | 1 | 4.10  | -1.37  | 0 | 0.00  | 0.00   |
| 74  | 4 | 782.79  | -167.39 | 3 | 139.68 | -29.35 | 3 | 97.96 | -20.37 | 0 | 0.00  | 0.00   |
| 77  | 1 | 203.84  | -45.52  | 1 | 52.92  | -12.46 | 1 | 4.10  | -1.37  | 0 | 0.00  | 0.00   |
| 78  | 1 | 250.09  | -55.61  | 0 | 0.00   | 0.00   | 0 | 0.00  | 0.00   | 0 | 0.00  | 0.00   |
| 85  | 1 | 17.88   | -4.63   | 1 | 0.05   | -0.08  | 1 | 0.06  | -0.09  | 1 | 2.89  | -1.05  |
| 86  | 1 | 605.20  | -132.91 | 1 | 35.85  | -8.67  | 1 | 18.20 | -4.70  | 1 | 17.32 | -4.50  |
| 95  | 1 | 2.93    | -1.06   | 1 | 4.81   | -1.55  | 1 | 4.76  | -1.54  | 1 | 4.84  | -1.56  |
| 96  | 4 | 3272.65 | -707.43 | 2 | 9.29   | -2.02  | 2 | 17.47 | -3.79  | 2 | 13.18 | -2.86  |
| 98  | 2 | 1381.39 | -299.97 | 2 | 9.29   | -2.02  | 2 | 17.47 | -3.79  | 2 | 13.18 | -2.86  |
| 102 | 1 | 0.03    | -0.07   | 1 | 0.25   | -0.21  | 1 | 0.59  | -0.36  | 1 | 0.58  | -0.35  |
| 104 | 2 | 1377.57 | -299.14 | 2 | 4.74   | -1.03  | 2 | 13.28 | -2.88  | 2 | 8.93  | -1.94  |
| 112 | 2 | 64.54   | -14.01  | 2 | 0.51   | -0.11  | 2 | 1.22  | -0.26  | 2 | 39.31 | -8.54  |

|     |   |         |         |   |      |       |   |       |       |   |       |       |
|-----|---|---------|---------|---|------|-------|---|-------|-------|---|-------|-------|
| 120 | 2 | 2858.50 | -620.72 | 1 | 0.25 | -0.21 | 1 | 0.59  | -0.36 | 1 | 0.58  | -0.35 |
| 133 | 2 | 192.39  | -41.78  | 1 | 0.25 | -0.21 | 1 | 0.59  | -0.36 | 1 | 0.58  | -0.35 |
| 140 | 2 | 190.04  | -41.27  | 1 | 0.25 | -0.21 | 1 | 0.59  | -0.36 | 1 | 0.58  | -0.35 |
| 142 | 2 | 192.39  | -41.78  | 1 | 0.25 | -0.21 | 1 | 0.59  | -0.36 | 1 | 0.58  | -0.35 |
| 149 | 2 | 1504.92 | -326.79 | 1 | 0.25 | -0.21 | 1 | 0.59  | -0.36 | 1 | 0.58  | -0.35 |
| 166 | 2 | 125.04  | -27.15  | 2 | 4.74 | -1.03 | 2 | 13.28 | -2.88 | 2 | 8.93  | -1.94 |
| 180 | 2 | 2658.12 | -577.20 | 2 | 4.79 | -1.04 | 2 | 13.21 | -2.87 | 2 | 10.53 | -2.29 |
| 181 | 2 | 220.16  | -47.81  | 2 | 4.79 | -1.04 | 2 | 13.21 | -2.87 | 2 | 10.53 | -2.29 |
| 182 | 1 | 80.78   | -18.60  | 1 | 0.31 | -0.24 | 1 | 0.77  | -0.42 | 1 | 2.18  | -0.85 |
| 188 | 1 | 105.05  | -23.92  | 1 | 0.12 | -0.14 | 1 | 2.80  | -1.03 | 1 | 9.62  | -2.72 |
| 189 | 2 | 105.46  | -22.90  | 2 | 3.19 | -0.69 | 2 | 5.08  | -1.10 | 2 | 8.98  | -1.95 |
| 190 | 1 | 104.05  | -23.70  | 1 | 0.07 | -0.10 | 1 | 2.49  | -0.94 | 1 | 8.74  | -2.51 |
| 231 | 2 | 224.61  | -48.77  | 2 | 4.55 | -0.99 | 2 | 14.90 | -3.24 | 2 | 18.19 | -3.95 |
| 233 | 2 | 1502.31 | -326.22 | 2 | 3.19 | -0.69 | 2 | 5.08  | -1.10 | 2 | 8.98  | -1.95 |
| 234 | 1 | 103.53  | -23.59  | 1 | 0.04 | -0.07 | 1 | 2.29  | -0.89 | 1 | 8.30  | -2.40 |
| 236 | 1 | 99.34   | -22.67  | 1 | 0.01 | -0.04 | 1 | 1.46  | -0.64 | 1 | 5.74  | -1.78 |



**Table S8. Effect estimates for the amino acids associated with risk of ACPA- and ACPA+ rheumatoid arthritis.**

(A) Effect estimates for ACPA- RA. We estimated the effect size of HLA-DRβ1 Ser11+Leu11 taking Val11+Asp11+Pro11+Gly11 as reference and HLA-B Asp9 taking His9+Tyr9 as reference. The effect size at HLA-DRβ1 Ser11+Leu11 is conditioned on HLA-B Asp9, and the effect size at HLA-B Asp9 is conditioned on HLA-DRβ1 Ser11+Leu11. We also show the unadjusted case/control allele frequencies and the classical alleles of *HLA-DRB1* and *HLA-B* corresponding to the amino acids. (B) Effect estimates for ACPA+ RA. For HLA-DRβ1, We defined haplotypes based on the amino acid residues present at position 11, 13, 71, and 74. For each haplotype, the multivariate effect is given as an odds ratio (OR), taking the most frequent haplotype (ProArgAlaAla) in the control samples as the reference (that is, giving that haplotype an OR of 1). The effects are conditioned on the remaining associated loci: position 9 in HLA-B, position 9 in HLA-DPβ1, and position 77 in HLA-A. We show the unadjusted allele frequencies and the classical alleles corresponding to each haplotype. We also list the effect sizes, allele frequencies and classical alleles corresponding to HLA-B Asp9, HLA-DPβ1 Phe9, and HLA-A Asn77. The effects of each of these positions were estimated conditioned on the remaining loci; e.g. the effects in HLA-B were conditioned on *HLA-DRB1* alleles, position 9 in HLA-DPβ1, and position 77 in HLA-A. 95% CI, 95% confidence interval.

| <b>A. ACPA- RA</b>                 |                                |           |                               |       |                                                                                                                                                      |
|------------------------------------|--------------------------------|-----------|-------------------------------|-------|------------------------------------------------------------------------------------------------------------------------------------------------------|
| HLA-DRβ1 amino acid at position 11 | OR                             | 95% CI    | Unadjusted allele frequencies |       | Classical <i>HLA-DRB1</i> alleles                                                                                                                    |
|                                    |                                |           | Controls                      | Cases |                                                                                                                                                      |
| Ser+Leu                            | 1.23                           | 1.15-1.32 | 0.514                         | 0.548 | *01, *03, *08, *11, *12, *13, *14                                                                                                                    |
| Val+Asp+Pro+Gly                    | Reference                      |           | 0.486                         | 0.452 | *04, *07, *09, *10, *15, *16                                                                                                                         |
| HLA-B amino acid at position 9     | Classical <i>HLA-B</i> alleles |           |                               |       |                                                                                                                                                      |
| Asp                                | 1.24                           | 1.14-1.36 | 0.131                         | 0.161 | *08                                                                                                                                                  |
| His, Tyr                           | Reference                      |           | 0.869                         | 0.839 | *07, *13, *14, *15, *18, *27, *35, *37, *38, *39, *40, *41, *42, *44, *45, *46, *47, *48, *49, *50, *51, *52, *53, *54, *55, *56, *57, *58, *73, *81 |

**B. ACPA+ RA**

| HLA-DRβ1 amino acid at position |     |     |     | Multivariate OR | 95% CI    | Unadjusted allele frequencies |       | Classical <i>HLA-DRB1</i> alleles |
|---------------------------------|-----|-----|-----|-----------------|-----------|-------------------------------|-------|-----------------------------------|
| 11                              | 13  | 71  | 74  |                 |           | Controls                      | Cases |                                   |
| Val                             | Phe | Arg | Ala | 4.65            | 3.80-5.70 | 0.007                         | 0.021 | *10:01                            |
| Val                             | His | Lys | Ala | 4.03            | 3.72-4.37 | 0.110                         | 0.292 | *04:01, *04:09                    |
| Val                             | His | Arg | Ala | 3.63            | 3.29-4.01 | 0.054                         | 0.123 | *04:04, *04:05, *04:08, *04:10    |
| Leu                             | Phe | Arg | Ala | 2.11            | 1.94-2.31 | 0.104                         | 0.146 | *01:01, *01:02                    |
| Asp                             | Phe | Arg | Glu | 1.82            | 1.52-2.18 | 0.013                         | 0.017 | *09:01                            |
| Pro                             | Arg | Arg | Ala | 1.58            | 1.26-1.99 | 0.009                         | 0.010 | *16:01, *16:02                    |
| Val                             | His | Arg | Glu | 1.29            | 1.06-1.57 | 0.016                         | 0.012 | *04:03, *04:06, *04:07, *04:11    |
| Ser                             | Gly | Arg | Ala | 1.04            | 0.86-1.25 | 0.018                         | 0.013 | *12:01, *12:02                    |
| Val                             | His | Glu | Ala | 1.03            | 0.71-1.50 | 0.005                         | 0.003 | *04:02, *04:37                    |
| Pro                             | Arg | Ala | Ala | 1.00            | Reference | 0.143                         | 0.094 | *15:01, *15:02, *15:03            |
| Gly                             | Tyr | Arg | Gln | 0.92            | 0.83-1.02 | 0.127                         | 0.067 | *07:01                            |
| Ser                             | Ser | Lys | Ala | 0.87            | 0.66-1.14 | 0.009                         | 0.005 | *13:03                            |



|                                   |     |     |     |                            |           |       |       |                                                                                                                                                      |
|-----------------------------------|-----|-----|-----|----------------------------|-----------|-------|-------|------------------------------------------------------------------------------------------------------------------------------------------------------|
| Ser                               | Gly | Arg | Leu | 0.83                       | 0.70-0.98 | 0.027 | 0.016 | *08:01, *08:02, *08:03, *08:04, *08:06, *14:15                                                                                                       |
| Ser                               | Ser | Arg | Glu | 0.77                       | 0.64-0.94 | 0.023 | 0.011 | *14:01, *14:05, *14:07                                                                                                                               |
| Ser                               | Ser | Arg | Ala | 0.76                       | 0.67-0.86 | 0.067 | 0.034 | *11:01, *11:04, *11:06, *11:08, *13:05, *14:02, *14:06                                                                                               |
| Leu                               | Phe | Glu | Ala | 0.71                       | 0.55-0.93 | 0.012 | 0.005 | *01:03                                                                                                                                               |
| Ser                               | Ser | Lys | Arg | 0.67                       | 0.60-0.76 | 0.127 | 0.081 | *03:01, *03:02, *03:04                                                                                                                               |
| Ser                               | Ser | Glu | Ala | 0.60                       | 0.54-0.67 | 0.115 | 0.046 | *11:02, *11:03, *13:01, *13:02, *13:04                                                                                                               |
| Ser                               | Gly | Arg | Glu | 0.49                       | 0.26-0.91 | 0.003 | 0.001 | *14:04                                                                                                                                               |
| HLA-B amino acid at position 9    |     |     |     | Classical HLA-B alleles    |           |       |       |                                                                                                                                                      |
| Asp                               |     |     |     | 2.13                       | 1.91-2.37 | 0.130 | 0.118 | *08                                                                                                                                                  |
| His, Tyr                          |     |     |     | 1.00                       | Reference | 0.870 | 0.882 | *07, *13, *14, *15, *18, *27, *35, *37, *38, *39, *40, *41, *42, *44, *45, *46, *47, *48, *49, *50, *51, *52, *53, *54, *55, *56, *57, *58, *73, *81 |
| HLA-DPβ1 amino acid at position 9 |     |     |     | Classical HLA-DPB1 alleles |           |       |       |                                                                                                                                                      |
| Phe                               |     |     |     | 1.31                       | 1.24-1.39 | 0.721 | 0.793 | *02, *04, *05, *16, *19, *23, *34                                                                                                                    |
| His, Tyr                          |     |     |     | 1.00                       | Reference | 0.279 | 0.207 | *01, *03, *06, *09, *10, *11, *13, *14, *15, *17, *18, *20, *21, *26, *30, *35                                                                       |
| HLA-A amino acid at position 77   |     |     |     | Classical HLA-A alleles    |           |       |       |                                                                                                                                                      |
| Asn                               |     |     |     | 0.85                       | 0.81-0.90 | 0.343 | 0.279 | *01, *23, *24, *26, *29, *30, *36, *80                                                                                                               |
| Asp, Ser                          |     |     |     | 1.00                       | Reference | 0.657 | 0.721 | *02, *03, *11, *25, *30, *31, *32, *33, *34, *66, *68, *69, *74                                                                                      |

**Table S9. Frequency of ancestral haplotype in six cohorts.** We calculated the frequency of ancestral 8.1 haplotype using the best guess imputation data that was phased across the MHC region.

| <b>Cohort</b> | <b>Ancestral Haplotype Frequency</b> |
|---------------|--------------------------------------|
| UK            | 0.131                                |
| US            | 0.106                                |
| Dutch         | 0.165                                |
| Swedish Umea  | 0.095                                |
| Spanish       | 0.052                                |
| Swedish EIRA  | 0.136                                |

**Table S10. Estimated proportions of confounding diseases in seronegative RA dataset.** Using risk scores built from the known associated loci to ACPA+ RA and ankylosing spondylitis (AS), we estimated the proportion of ACPA+ RA and AS samples within ACPA- (**Online Methods**). We applied two different approaches; (A) We used logistic regression that includes the ACPA+ risk score and AS risk score, and no candidate associations to ACPA- RA. (B) We used logistic regression that includes not only the ACPA+ risk score and AS risk score but also the two variables that are putatively associated to ACPA- RA, Ser+Leu-11 of HLA-DR $\beta$ 1 and Asp-9 of HLA-B. 95% C.I., 95% confidence interval.

| Cohort       | (A) Regression using risk scores only |             |       |              | (B) Regression using risk scores and putative associations in ACPA- RA |             |       |              |
|--------------|---------------------------------------|-------------|-------|--------------|------------------------------------------------------------------------|-------------|-------|--------------|
|              | ACPA+                                 | 95% C.I.    | AS    | 95% C.I.     | ACPA+                                                                  | 95% C.I.    | AS    | 95% C.I.     |
| UK           | 0.241                                 | 0.185-0.296 | 0.099 | 0.055-0.142  | 0.282                                                                  | 0.223-0.340 | 0.100 | 0.056-0.144  |
| US           | 0.366                                 | 0.279-0.452 | 0.041 | -0.032-0.115 | 0.409                                                                  | 0.320-0.498 | 0.048 | -0.025-0.122 |
| Dutch        | 0.152                                 | 0.034-0.270 | 0.082 | -0.017-0.181 | 0.184                                                                  | 0.063-0.304 | 0.088 | -0.011-0.188 |
| Swedish Umea | 0.199                                 | 0.073-0.326 | 0.108 | 0.030-0.185  | 0.256                                                                  | 0.127-0.384 | 0.112 | 0.034-0.190  |
| Spanish      | 0.340                                 | 0.170-0.510 | 0.079 | -0.066-0.225 | 0.381                                                                  | 0.210-0.552 | 0.073 | -0.073-0.220 |
